# Supplementary material for: The Differential Impact of SRC Expression on the Prognosis of Patients with Head and Neck Squamous Cell Carcinoma
Source: Cancers (Basel). 2019 Oct 25;11(11):1644. doi: 10.3390/cancers11111644 (PMC6896085; doi:10.3390/cancers11111644)
Supplement: Supplementary file 1 [file cancers-11-01644-s001.zip › Supplementary Table S1.csv]

Age	Site	pT	pN	Grade	Stage	Status	Months Follow-up	Recurrence	active SRC	Nuclear p-SRC	Cytoplasmic p-SRC	Full SRC activation	CTTN	FAK	ASAP1
52	Larynx	3	2	Moderately	4	Alive	80	no	Negative	Positive	Positive	1	Positive	Positive	Negative
52	Larynx	3	2	Well	4	Dead by tumor	22	yes	Positive	Positive	Negative	2	Negative	Negative	Negative
65	Larynx	4	0	Well	4	Alive	80	no	Negative	Negative	Negative	0	Negative	Negative	Negative
57	Larynx	4	0	Moderately	4	Alive	89	no	Positive	Negative	Negative	1	Negative	Positive	Positive
37	Larynx	4	1	Well	4	Lost follow up	29	yes	Negative	Negative	Negative	0	Negative	Negative	Positive
81	Larynx	3	0	Moderately	3	Lost follow up	46	no	Positive	Positive	Negative	2	Negative	Positive	Positive
74	Larynx	4	1	Moderately	4	Dead by tumor	32	yes	Positive	Positive	Negative	2	Negative	Positive	Negative
70	Larynx	4	2	Moderately	4	Died of other causes	36	no	Negative	Positive	Negative	1	Positive	Positive	Negative
36	Larynx	4	0	Well	4	Dead by tumor	32	yes	Positive	Positive	Positive	2	Negative	Negative	Positive
63	Larynx	3	2	Moderately	4	Dead by tumor	18	yes	Positive	Positive	Negative	2	Negative	Positive	Negative
71	Larynx	1	0	Well	1	Dead by tumor	67	yes	Positive				Positive	Positive	Negative
53	Larynx	1	0	Well	1	Died of other causes	24	no	Positive	Positive	Negative	2	Positive	Negative	Negative
65	Larynx	3	1	Moderately	3	Alive	72	no	Positive	Positive	Negative	2	Positive	Positive	Negative
85	Larynx	3	0	Well	3	Lost follow up	44	no	Negative	Positive	Negative	1	Negative	Negative	Positive
61	Larynx	3	2	Moderately	4	Dead by tumor	6	yes	Positive	Positive	Negative	2	Negative	Positive	Positive
67	Larynx	1	0	Moderately	1	Alive	82	no	Negative	Negative	Negative	0	Negative	Negative	Negative
73	Larynx	2	2	Moderately	4	Died of other causes	51	no	Positive	Positive	Negative	2	Negative	Positive	Positive
75	Larynx	3	2	Well	4	Dead by tumor	19	yes	Positive	Positive	Negative	2	Negative	Positive	Positive
53	Larynx	3	1	Well	3	Lost follow up	25	no	Positive				Negative	Positive	Positive
68	Larynx	4	2	Well	4	Dead by tumor	11	yes	Positive	Negative	Negative	1	Positive	Positive	Positive
62	Larynx	1	1	Well	3	Alive	66	no	Positive	Positive	Negative	2	Negative	Negative	Positive
56	Larynx	3	0	Moderately	3	Alive	68	no	Positive	Positive	Negative	2	Negative	Positive	Positive
44	Larynx	3	0	Moderately	3	Alive	62	no	Negative	Positive	Positive	1	Negative	Positive	Negative
71	Larynx	3	1	Moderately	3	Lost follow up	37	no	Positive	Positive	Negative	2	Positive	Positive	Negative
50	Larynx	3	2	Moderately	4	Dead by tumor	4	yes	Positive	Positive	Negative	2	Positive	Negative	Positive
80	Larynx	3	0	Moderately	3	Dead by tumor	12	yes	Positive	Positive	Negative	2	Negative	Positive	Positive
44	Larynx	2	3	Well	4	Alive	80	no	Negative	Positive	Negative	1	Positive	Positive	Positive
66	Larynx	3	0	Well	3	Alive	62	no	Positive	Negative	Negative	1	Negative	Negative	Negative
86	Larynx	3	0	Poorly	3	Died of other causes	15	no	Positive	Negative	Negative	1	Negative	Negative	Negative
54	Larynx	3	0	Well	3	Alive	61	no	Positive	Positive	Negative	2	Negative	Positive	Positive
74	Larynx	4	2	Moderately	4	Dead by tumor	9	yes	Positive	Positive	Negative	2	Negative	Positive	Positive
50	Larynx	4	3	Poorly	4	Dead by tumor	26	yes	Positive	Positive	Positive	2	Positive	Positive	Negative
48	Larynx	4	0	Moderately	4	Lost follow up	2	no	Positive	Positive	Negative	2	Negative	Negative	Positive
67	Larynx	3	0	Moderately	3	Alive	59	yes	Negative	Positive	Negative	1	Positive	Positive	Negative
72	Larynx	4	0	Poorly	4	Dead by tumor	14	yes	Positive	Positive	Negative	2	Positive	Negative	Positive
39	Larynx	4	2	Moderately	4	Dead by tumor	15	yes	Positive	Positive	Negative	2	Positive	Positive	Positive
59	Larynx	3	1	Moderately	3	Alive	55	no	Negative	Positive	Negative	1	Negative	Positive	Negative
77	Larynx	4	1	Poorly	4	Lost follow up	35	no	Positive	Positive	Positive	2	Negative	Positive	Positive
56	Larynx	3	0	Poorly	3	Alive	52	no	Negative	Positive	Negative	1	Negative	Positive	Negative
52	Larynx	1	0	Moderately	1	Lost follow up	54	no	Positive	Positive	Positive	2	Negative	Positive	Negative
59	Larynx	1	0	Well	1	Alive	75	no	Negative	Positive	Negative	1	Positive	Positive	Negative
64	Larynx	1	0	Well	1	Alive	70	no	Positive	Positive	Positive	2	Negative	Positive	Negative
42	Larynx	1	0	Well	1	Alive	66	no	Negative	Positive	Positive	1	Negative	Negative	Negative
75	Larynx	1	0	Well	1	Died of other causes	17	no	Negative	Negative	Negative	0	Negative	Negative	Negative
68	Larynx	1	0	Well	1	Alive	76	no	Negative	Negative	Negative	0	Negative	Negative	Positive
60	Larynx	1	0	Well	1	Alive	77	no	Negative	Negative	Negative	0	Positive	Negative	Negative
73	Pharynx	1	0	Well	1	Died of other causes	1	no	Positive	Positive	Negative	2	Positive	Positive	Positive
72	Pharynx	4	1	Moderately	4	Died of other causes	68	no	Positive	Positive	Negative	2	Positive	Positive	Negative
69	Pharynx	2	2	Moderately	4	Dead by tumor	48	yes	Positive	Positive	Negative	2	Negative	Positive	Positive
61	Pharynx	3	2	Well	4	Dead by tumor	21	yes	Positive	Positive	Negative	2	Positive	Positive	Positive
49	Pharynx	4	1	Moderately	4	Dead by tumor	10	yes	Positive	Positive	Negative	2	Positive	Positive	Positive
52	Pharynx	3	3	Moderately	4	Alive	73	no	Positive	Positive	Negative	2	Positive	Positive	Positive
45	Pharynx	2	2	Moderately	4	Dead by tumor	9	yes	Positive	Positive	Positive	2	Positive	Positive	Positive
56	Pharynx	1	2	Poorly	4	Dead by tumor	12	yes	Positive	Positive	Negative	2	Positive	Positive	Positive
49	Pharynx	3	2	Poorly	4	Dead by tumor	5	yes	Positive	Positive	Negative	2	Negative	Negative	Positive
49	Pharynx	3	2	Well	4	Alive	63	no	Positive	Positive	Negative	2	Positive	Negative	Positive
43	Pharynx	4	2	Moderately	4	Died of other causes	33	yes	Positive	Positive	Negative	2	Positive	Negative	Positive
52	Pharynx	3	2	Moderately	4	Died of other causes	28	no	Positive	Positive	Negative	2	Positive	Positive	Positive
63	Pharynx	2	2	Poorly	4	Alive	58	yes	Positive				Negative	Positive	Negative
68	Pharynx	3	0	Poorly	3	Alive	77	no	Positive	Positive	Positive	2	Positive	Positive	Positive
64	Pharynx	4	2	Poorly	4	Dead by tumor	11	yes	Positive	Positive	Negative	2	Positive	Positive	Negative
53	Pharynx	2	2	Moderately	4	Lost follow up	5	no	Negative	Positive	Negative	1	Positive	Positive	Positive
60	Pharynx	4	2	Well	4	Dead by tumor	45	yes	Negative	Positive	Negative	1	Positive	Negative	Positive
58	Pharynx	2	0	Moderately	2	Alive	58	yes	Negative	Positive		1	Negative	Positive	Positive
78	Pharynx	3	1	Poorly	3	Lost follow up	1	no	Positive	Positive	Negative	2	Positive	Positive	Positive
68	Pharynx	3	1	Moderately	3	Alive	54	no	Positive	Positive	Negative	2	Negative	Positive	Positive
59	Pharynx	4	2	Moderately	4	Alive	51	no	Positive	Positive		2	Negative	Positive	Positive
56	Pharynx	2	2	Moderately	4	Died of other causes	71	no	Positive	Positive	Negative	2	Positive	Positive	Negative
46	Pharynx	4	3	Well	4	Dead by tumor	18	yes	Positive	Positive	Negative	2	Negative	Positive	Positive
57	Pharynx	2	2	Poorly	4	Dead by tumor	19	yes	Positive	Positive	Negative	2	Positive	Positive	Positive
50	Pharynx	2	0	Moderately	2	Alive	95	no	Positive	Positive		2	Positive	Negative	Positive
52	Pharynx	4	2	Well	4	Dead by tumor	6	yes	Positive	Positive	Negative	2	Positive	Negative	Positive
52	Pharynx	4	2	Well	4	Alive	83	no	Negative	Negative	Negative	0	Negative	Negative	Negative
58	Pharynx	4	0	Moderately	4	Died of other causes	33	no	Positive	Positive	Negative	2	Positive	Negative	Negative
65	Pharynx	2	2	Moderately	4	Dead by tumor	8	yes	Negative	Negative		0	Positive	Negative	Negative
58	Pharynx	4	2	Moderately	4	Dead by tumor	12	yes	Positive	Positive	Negative	2	Positive	Positive	Positive
62	Larynx	3	2	Moderately	4	Dead by tumor	59	yes	Positive	Positive	Negative	2	Negative	Positive	Positive
65	Larynx	2	1	Poorly	3	Dead by tumor	19	yes	Positive	Positive	Negative	2	Negative	Positive	Negative
64	Pharynx	1	0	Well	1	Dead by tumor	27	yes	Positive	Positive	Negative	2	Positive	Negative	Positive
65	Pharynx	4	1	Well	4	Dead by tumor	19	yes	Positive	Positive	Negative	2	Positive	Negative	Positive
71	Pharynx	1	3	Poorly	4	Dead by tumor	12	yes	Positive	Positive	Negative	2	Positive	Positive	Negative
63	Larynx	4	2	Moderately	4	Dead by tumor	9	yes	Negative	Positive	Negative	1	Negative	Negative	Negative
54	Pharynx	3	2	Poorly	3	Dead by tumor	11	yes	Positive	Positive	Negative	2	Positive	Positive	Positive
50	Pharynx	4	2	Moderately	4	Dead by tumor	0	yes	Positive	Positive	Negative	2	Negative	Positive	Negative
62	Pharynx	2	2	Poorly	4	Dead by tumor	30	yes	Positive	Positive	Negative	2	Positive	Positive	Positive
59	Pharynx	4	0	Poorly	4	Dead by tumor	50	yes	Negative	Positive	Negative	1	Positive	Positive	Negative
65	Pharynx	3	2	Well	4	Dead by tumor	48	yes	Positive	Positive	Negative	2	Negative	Positive	Positive
55	Larynx	4	0	Moderately	4	Died of other causes	97	yes	Negative	Positive	Negative	1	Negative	Negative	Positive
62	Larynx	4	2	Well	4	Dead by tumor	12	yes	Positive	Positive	Negative	2	Negative	Positive	Positive
47	Pharynx	4	2	Poorly	4	Dead by tumor	18	yes	Positive	Positive	Negative	2	Positive	Negative	Negative
62	Larynx	3	2	Poorly	4	Dead by tumor	9	yes	Positive	Positive	Negative	2	Positive	Positive	Negative
64	Pharynx	3	2	Well	4	Dead by tumor	9	yes	Positive	Positive	Negative	2	Negative	Negative	Positive
61	Pharynx	3	2	Moderately	4	Dead by tumor	43	yes	Positive	Positive	Negative	2	Positive	Positive	Positive
61	Pharynx	4	3	Moderately	4	Dead by tumor	7	yes	Negative	Positive	Negative	1	Negative	Positive	Negative
66	Larynx	4	2	Moderately	4	Dead by tumor	49	yes	Positive	Positive	Negative	2	Positive	Positive	Negative
53	Pharynx	3	2	Moderately	4	Dead by tumor	8	yes	Positive	Positive	Negative	2	Negative	Positive	Positive
80	Pharynx	3	3	Poorly	4	Dead by tumor	4	yes	Positive	Positive	Negative	2	Negative	Positive	Negative
72	Pharynx	4	1	Poorly	4	Dead by tumor	3	yes	Negative	Positive	Negative	1	Positive	Positive	Negative
62	Pharynx	1	2	Moderately	4	Dead by tumor	30	yes	Positive				Positive	Positive	Negative
70	Larynx	3	0	Moderately	3	Dead by tumor	60	yes	Positive	Positive	Positive	2	Negative	Positive	Positive
62	Pharynx	4	2	Poorly	4	Dead by tumor	30	yes	Positive	Positive	Negative	2	Negative	Positive	Positive
52	Pharynx	3	3	Moderately	4	Dead by tumor	21	yes	Positive	Positive	Negative	2	Negative	Positive	Positive
49	Pharynx	4	3	Moderately	4	Dead by tumor	27	yes	Positive	Positive	Negative	2	Positive	Positive	Negative
79	Larynx	2	2	Poorly	4	Dead by tumor	11	yes	Positive	Positive	Negative	2	Positive	Positive	Negative
58	Pharynx	3	2	Poorly	4	Dead by tumor	9	yes	Positive	Positive	Negative	2	Positive	Negative	Positive
52	Larynx	3	0	Poorly	3	Dead by tumor	14	yes	Positive	Positive	Negative	2	Positive	Positive	Negative
53	Pharynx	2	0	Well	2	Dead by tumor	12	yes	Positive				Positive	Positive	Negative
52	Pharynx	4	0	Moderately	4	Dead by tumor	12	yes	Positive	Positive	Negative	2	Positive	Positive	Positive
55	Pharynx	4	2	Poorly	4	Dead by tumor	7	yes	Positive	Positive	Negative	2	Positive	Positive	Negative
54	Pharynx	4	2	Poorly	4	Dead by tumor	12	yes	Negative	Positive	Negative	1	Positive	Positive	Positive
80	Pharynx	2	0	Poorly	4	Dead by tumor	30	yes	Negative	Positive	Negative	1	Positive	Positive	Positive
72	Pharynx	4	2	Poorly	4	Alive	59	no	Positive	Positive	Negative	2	Positive	Positive	Negative
44	Pharynx	3	2	Moderately	4	Dead by tumor	21	yes	Positive	Positive	Negative	2	Negative	Positive	Positive
67	Larynx	4	0	Poorly	4	Alive	48	yes	Positive	Positive	Negative	2	Negative	Positive	Negative
67	Pharynx	4	2	Moderately	4	Dead by tumor	18	yes	Positive	Positive	Negative	2	Negative	Positive	Negative
56	Larynx	4	2	Moderately	4	Dead by tumor	10	yes	Positive	Negative	Negative	1	Negative	Positive	Negative
